# Supplementary material for: Environmental Exposure to Triclosan and Semen Quality
Source: PubMed Central journal article supplement (PMC4772244; doi:10.3390/ijerph13020224), 2016-02-17
Supplement: ijerph-13-00224-s001.pdf [file ijerph-13-00224-s001.pdf]

# Supplementary Materials: Environmental Exposure to Triclosan and Semen Quality

Wenting Zhu, Hao Zhang, Chuanliang Tong, Chong Xie, Guohua Fan, Shasha Zhao, Xiaogang Yu, Ying Tian and Jun Zhang

Table S1. Did you come into contact with the following material in the nearly one year?

| Material                                                         | Factors                  |                          |                          |
|------------------------------------------------------------------|--------------------------|--------------------------|--------------------------|
|                                                                  | No                       | Yes                      | Not Clear                |
| Pesticides (against for pests, cockroach mosquito, <i>etc.</i> ) | <input type="checkbox"/> | <input type="checkbox"/> | <input type="checkbox"/> |
| Bactericide (for plants)                                         | <input type="checkbox"/> | <input type="checkbox"/> | <input type="checkbox"/> |
| Herbicide (for plants)                                           | <input type="checkbox"/> | <input type="checkbox"/> | <input type="checkbox"/> |
| Insecticide (for plants)                                         | <input type="checkbox"/> | <input type="checkbox"/> | <input type="checkbox"/> |
| Polishing Material                                               | <input type="checkbox"/> | <input type="checkbox"/> | <input type="checkbox"/> |
| Paint                                                            | <input type="checkbox"/> | <input type="checkbox"/> | <input type="checkbox"/> |
| Degreasing Agent                                                 | <input type="checkbox"/> | <input type="checkbox"/> | <input type="checkbox"/> |
| Adhesives                                                        | <input type="checkbox"/> | <input type="checkbox"/> | <input type="checkbox"/> |
| Oil Cleaner                                                      | <input type="checkbox"/> | <input type="checkbox"/> | <input type="checkbox"/> |
| Soldering                                                        | <input type="checkbox"/> | <input type="checkbox"/> | <input type="checkbox"/> |
| X-ray                                                            | <input type="checkbox"/> | <input type="checkbox"/> | <input type="checkbox"/> |
| Chemical Cleaner                                                 | <input type="checkbox"/> | <input type="checkbox"/> | <input type="checkbox"/> |
| Dye                                                              | <input type="checkbox"/> | <input type="checkbox"/> | <input type="checkbox"/> |
| Pharmaceutical Industry                                          | <input type="checkbox"/> | <input type="checkbox"/> | <input type="checkbox"/> |
| Laboratory Chemicals                                             | <input type="checkbox"/> | <input type="checkbox"/> | <input type="checkbox"/> |
| Anesthesia or Disinfectant                                       | <input type="checkbox"/> | <input type="checkbox"/> | <input type="checkbox"/> |
| Strong Acid or Alkali                                            | <input type="checkbox"/> | <input type="checkbox"/> | <input type="checkbox"/> |
| lead or Other Heavy Metals                                       | <input type="checkbox"/> | <input type="checkbox"/> | <input type="checkbox"/> |
| Other Chemicals (please write it/them down)                      |                          |                          |                          |

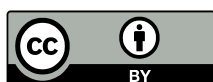

© 2016 by the authors; licensee MDPI, Basel, Switzerland. This article is an open access article distributed under the terms and conditions of the Creative Commons by Attribution (CC-BY) license (<http://creativecommons.org/licenses/by/4.0/>).
